# Supplementary material for: Lesions and viral loads in racing pigeons naturally coinfected with pigeon circovirus and columbid alphaherpesvirus 1 in Australia
Source: PubMed Central journal article supplement — J Vet Diagn Invest. 2023 Mar 10;35(3):278–83. doi: 10.1177/10406387231156839 (PMC10185993; doi:10.1177/10406387231156839), 2023-03-10
Supplement: sj-pdf-1-vdi-10.1177_10406387231156839.pdf [file sj-pdf-1-vdi-10.1177_10406387231156839.pdf]

Nath BK, et al. Lesions and viral loads in racing pigeons naturally coinfecting with pigeon circovirus and columbid alphaherpesvirus 1 in Australia

**Supplemental Table 1.** Viral copy numbers of pigeon circovirus (PiCV) and columbid alphaherpesvirus 1 (CoHV1) in tissues from 4 dead birds and swab samples from 46 other birds in the flock.

| Bird | Sample           | Clinical status | PiCV copy number/ $\mu$ L | CoHV1 copy number/ $\mu$ L |
|------|------------------|-----------------|---------------------------|----------------------------|
| 1    | Liver            | Dead            | $1.05 \times 10^8$        | $1.72 \times 10^2$         |
|      | Oropharynx       | Dead            | $2.62 \times 10^7$        | $4.52 \times 10^4$         |
|      | Bursa            | Dead            | $2.54 \times 10^8$        | $3.38 \times 10^2$         |
| 2    | Liver            | Dead            | $2.38 \times 10^{11}$     | $7.03 \times 10^3$         |
|      | Oropharynx       | Dead            | $2.84 \times 10^9$        | $2.68 \times 10^6$         |
|      | Bursa            | Dead            | $2.37 \times 10^8$        | $3.18 \times 10^3$         |
| 3    | liver            | Dead            | $1.82 \times 10^9$        | $2.66 \times 10^6$         |
|      | bursa            | Dead            | $5.05 \times 10^7$        | $4.28 \times 10^4$         |
|      | Oropharynx       | Dead            | $1.33 \times 10^8$        | $2.46 \times 10^6$         |
| 4    | Bursa            | Dead            | $2.10 \times 10^9$        | $3.64 \times 10^2$         |
|      | Liver            | Dead            | $1.37 \times 10^{10}$     | $4.48 \times 10^2$         |
|      | Oropharynx       | Dead            | $5.29 \times 10^8$        | $1.89 \times 10^4$         |
| 5    | Oro-cloacal swab | Healthy         | $5.90 \times 10^1$        | ND                         |
| 6    | Oro-cloacal swab | Healthy         | $7.31 \times 10^3$        | ND                         |
| 7    | Oro-cloacal swab | Healthy         | $4.48 \times 10^2$        | $2.40 \times 10^1$         |
| 8    | Oro-cloacal swab | Healthy         | $2.98 \times 10^3$        | ND                         |
| 9    | Oro-cloacal swab | Healthy         | $1.06 \times 10^3$        | ND                         |
| 10   | Oro-cloacal swab | Healthy         | $9.40 \times 10^1$        | ND                         |
| 11   | Oro-cloacal swab | Healthy         | $8.61 \times 10^3$        | ND                         |
| 12   | Oro-cloacal swab | Healthy         | $2.97 \times 10^2$        | ND                         |
| 13   | Oro-cloacal swab | Healthy         | $4.31 \times 10^2$        | ND                         |
| 14   | Oro-cloacal swab | Healthy         | $2.06 \times 10^3$        | ND                         |
| 15   | Oro-cloacal swab | Healthy         | $1.80 \times 10^2$        | $4.50 \times 10^1$         |
| 16   | Oro-cloacal swab | Healthy         | $2.88 \times 10^3$        | $1.51 \times 10^2$         |
| 17   | Oro-cloacal swab | Healthy         | $2.75 \times 10^2$        | ND                         |
| 18   | Oro-cloacal swab | Healthy         | $3.34 \times 10^2$        | ND                         |
| 19   | Oro-cloacal swab | Healthy         | $5.19 \times 10^2$        | ND                         |
| 20   | Oro-cloacal swab | Healthy         | $2.08 \times 10^3$        | ND                         |
| 21   | Oro-cloacal swab | Healthy         | $1.66 \times 10^2$        | $2.30 \times 10^1$         |
| 22   | Oro-cloacal swab | Healthy         | $4.89 \times 10^2$        | $3.00 \times 10^1$         |
| 23   | Oro-cloacal swab | Healthy         | $3.85 \times 10^2$        | ND                         |

Lesions in pigeons coinfectd with PiCV and CoHV1

|    |                  |                   |                    |                     |
|----|------------------|-------------------|--------------------|---------------------|
| 24 | Oro-cloacal swab | Healthy           | $1.43 \times 10^3$ | ND                  |
| 25 | Oro-cloacal swab | Healthy           | $2.10 \times 10^2$ | ND                  |
| 26 | Oro-cloacal swab | Healthy           | $2.89 \times 10^2$ | ND                  |
| 27 | Oro-cloacal swab | Affected          | $1.02 \times 10^7$ | $3.30 \times 10^1$  |
| 28 | Oro-cloacal swab | Healthy           | $7.05 \times 10^3$ | $5.20 \times 10^1$  |
| 29 | Oro-cloacal swab | Affected          | $2.80 \times 10^8$ | ND                  |
| 30 | Oro-cloacal swab | Healthy recovered | ND                 | ND                  |
| 31 | Oro-cloacal swab | Affected          | $8.98 \times 10^8$ | $1.86 \times 10^5$  |
| 32 | Oro-cloacal swab | Affected          | $1.74 \times 10^5$ | $4.57 \times 10^3$  |
| 33 | Oro-cloacal swab | Affected          | $8.69 \times 10^7$ | $1.40 \times 10^1$  |
| 34 | Oro-cloacal swab | Healthy recovered | $6.60 \times 10^1$ | $6.15 \times 10^2$  |
| 35 | Oro-cloacal swab | Healthy           | $8.26 \times 10^4$ | $8.17 \times 10^2$  |
| 36 | Oro-cloacal swab | Affected          | $3.43 \times 10^7$ | $2.731 \times 10^3$ |
| 37 | Oro-cloacal swab | Healthy           | $1.97 \times 10^2$ | $8.00 \times 10^1$  |
| 38 | Oro-cloacal swab | Affected          | $2.77 \times 10^6$ | $8.00 \times 10^1$  |
| 39 | Oro-cloacal swab | Healthy           | $7.34 \times 10^2$ | $6.68 \times 10^2$  |
| 40 | Oro-cloacal swab | Healthy adult*    | $6.96 \times 10^3$ | ND                  |
| 41 | Oro-cloacal swab | Healthy adult*    | $1.09 \times 10^4$ | ND                  |
| 42 | Oro-cloacal swab | Healthy adult*    | $1.04 \times 10^3$ | ND                  |
| 43 | Oro-cloacal swab | Healthy adult*    | ND                 | ND                  |
| 44 | Oro-cloacal swab | Healthy adult*    | $7.09 \times 10^6$ | $7.00 \times 10^1$  |
| 45 | Oro-cloacal swab | Healthy           | $8.36 \times 10^4$ | $8.27 \times 10^2$  |
| 46 | Oro-cloacal swab | Healthy           | $7.44 \times 10^2$ | $6.78 \times 10^2$  |
| 47 | Oro-cloacal swab | Healthy squab     | $3.00 \times 10^1$ | ND                  |
| 48 | Oro-cloacal swab | Healthy squab     | $1.00 \times 10^1$ | ND                  |
| 49 | Oro-cloacal swab | Healthy squab     | $1.80 \times 10^1$ | $1.10 \times 10^1$  |
| 50 | Oro-cloacal swab | Healthy squab     | $3.40 \times 10^1$ | $1.70 \times 10^1$  |

ND = not detected.

\* Suspect case zero.

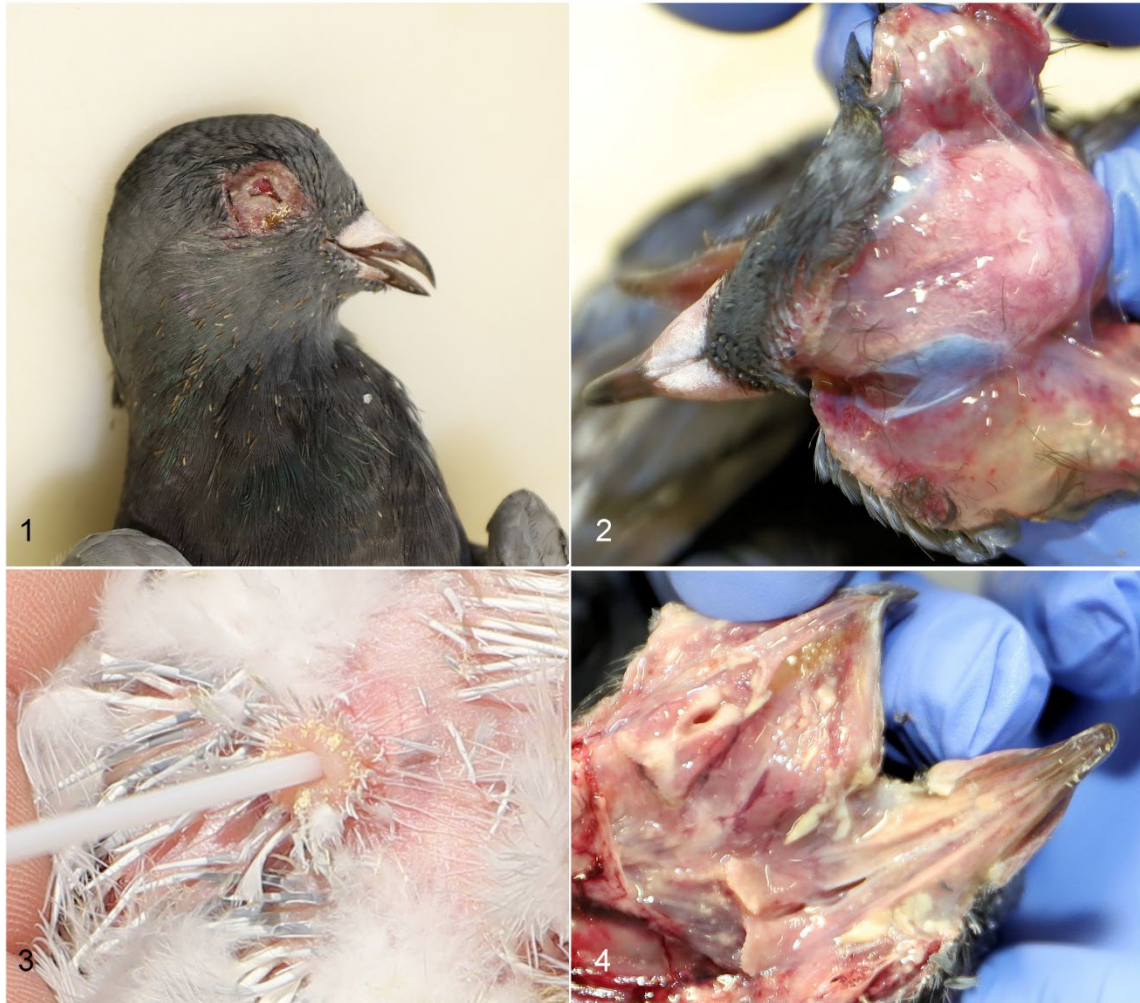

**Supplemental Figures 1–4.** Clinical signs in young rock pigeons (*Columba livia*) naturally coinfectd with PiCV and CoHV1. **Supplemental Figure 1.** Diffuse conjunctivitis. **Supplemental Figure 2.** Severe diffuse subcutaneous facial edema. **Supplemental Figure 3.** Peri-cloacal hyperkeratosis. **Supplemental Figure 4.** Fibrinosuppurative pharyngitis.

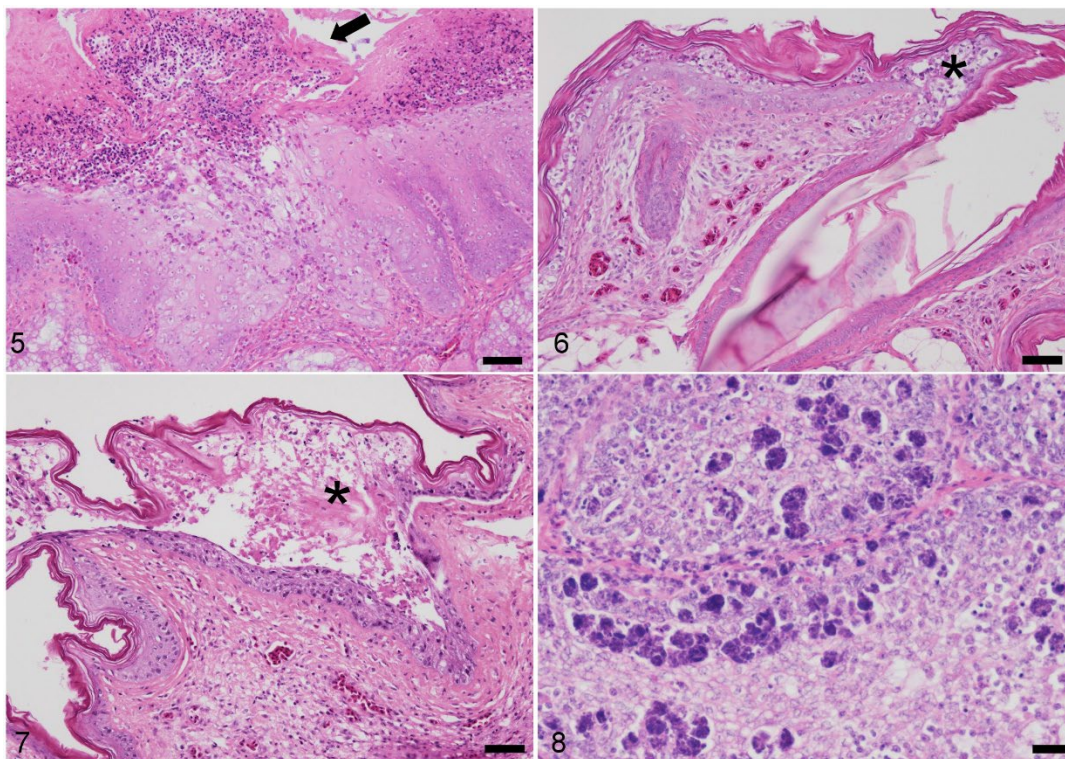

**Supplemental Figures 5–8.** Histopathologic findings in young rock pigeons naturally coinfecting with PiCV and CoHV1. **Supplemental Figure 5.** Laryngeal mucosa with thick serocellular exudate of heterophils (arrow) and disruption of epithelium. Bar = 50  $\mu$ m. **Supplemental Figure 6.** Peri-cloacal skin and feather follicle infundibulum with diffuse ballooning degeneration of keratinocytes (\*) and mixed inflammatory cells in the dermis. Bar = 50  $\mu$ m. **Supplemental Figure 7.** Vesicle formation in peri-cloacal skin with subcorneal pustule (\*) containing degenerate heterophils. Bar = 50  $\mu$ m. **Supplemental Figure 8.** Bursa of Fabricius with basophilic botryoid intracytoplasmic inclusion bodies indicative of PiCV infection. Bar = 20  $\mu$ m.

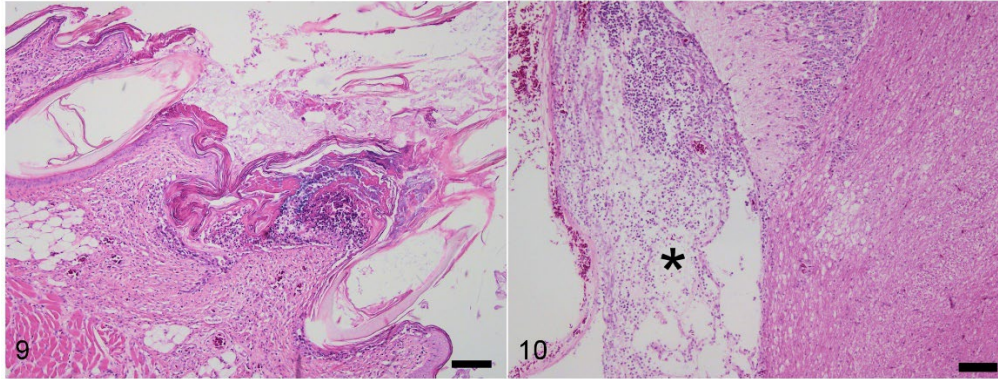

**Supplemental Figures 9, 10.** Histopathologic findings in young rock pigeons naturally coinfecting with PiCV and CoHV1. **Supplemental Figure 9.** Peri-cloacal skin with foci of intense heterophilic inflammation. Bar = 100  $\mu$ m. **Supplemental Figure 10.** Severe thickening of the meninges with edema, hemorrhage, and a diffuse infiltrate of macrophages and heterophils (\*). Bar = 100  $\mu$ m.

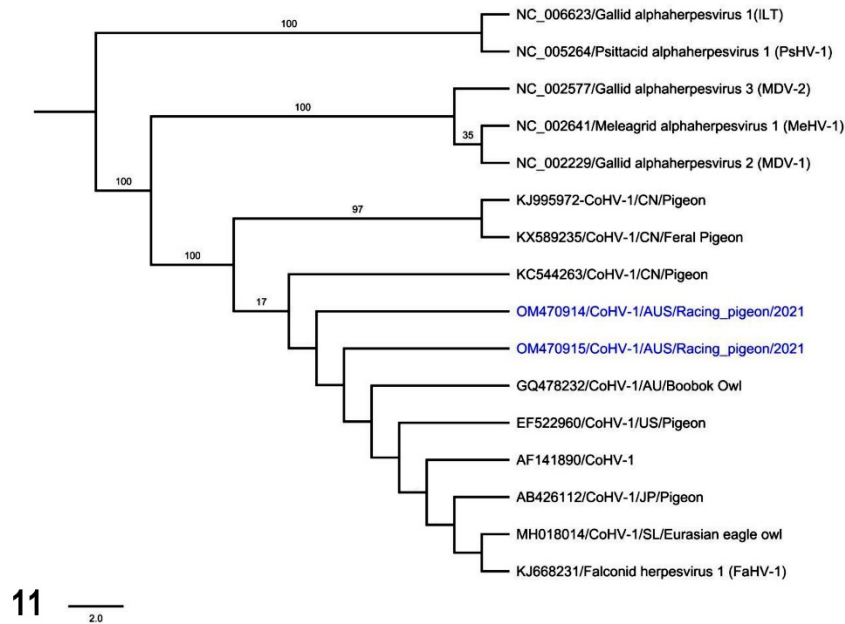

11

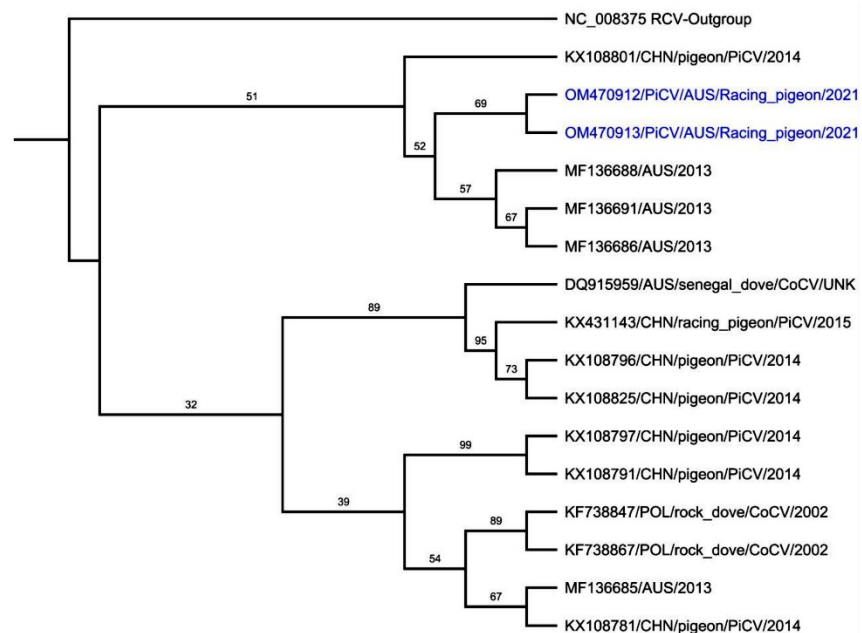

12

**Supplemental Figures 11, 12.** Phylogenetic analysis of CoHV1 and PiCV sequences.

**Supplemental Figure 11.** Maximum likelihood (ML) phylogenetic tree of avian herpesviruses DNA dependent DNA polymerase (*DDDP*) gene. **Supplemental Figure 12.** ML phylogenetic tree of PiCV replication-associated (*Rep*) gene. Our sequences are highlighted in blue.

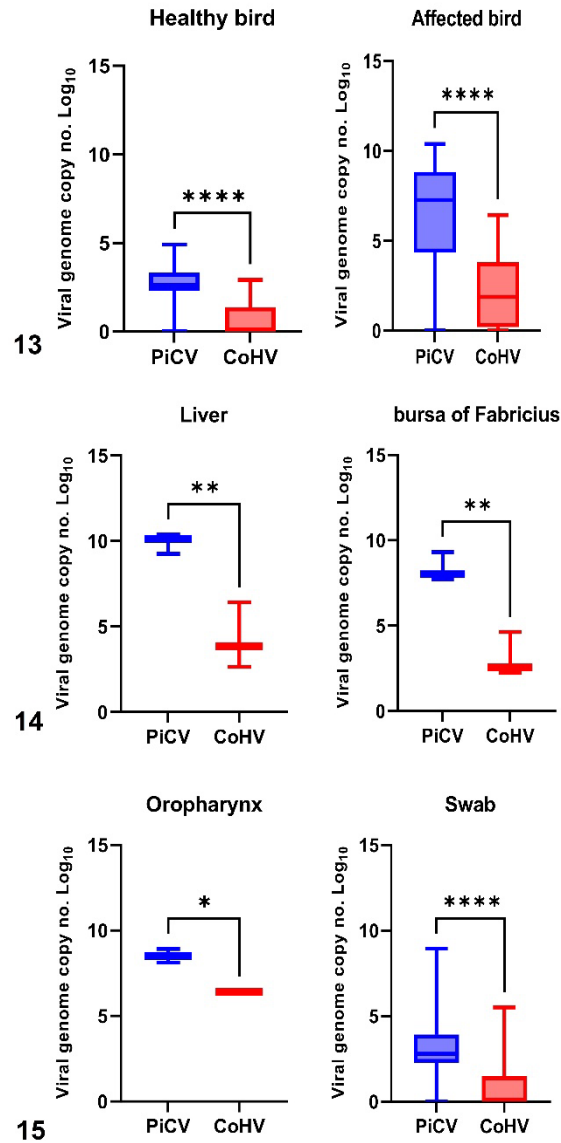

**Supplemental Figures 13–15.** Association between PiCV and CoHV1 copy numbers.

**Supplemental Figure 13.** Comparison of viral loads in oro-cloacal swabs from healthy birds and clinically affected birds. **Supplemental Figure 14.** Viral loads in liver and bursa of Fabricius from birds collected during postmortem examination. **Supplemental Figure 15.** Comparison of viral loads in oropharyngeal swab collected from 4 dead birds during postmortem examination with combined oro-cloacal swabs collected from healthy and affected birds.

**Supplemental Link 1.** Cloaca including bursa of Fabricius and adjacent skin demonstrating circoviral inclusion bodies in the bursa and skin as well as subcorneal pustules with eosinophilic intranuclear herpesvirus-like inclusion bodies within keratinocytes.

<https://slice.edu.au/s/73c9031b>

**Supplemental Link 2.** Section through brain and middle ear demonstrating bilateral tympanitis and diffuse granulomatous meningitis. <https://slice.edu.au/s/6511e3a9>
